# Supplementary material for: Analysis of the types of Reinholdella, an important Jurassic foraminiferal genus
Source: Copernicus journal article supplement (doi:10.5194/jm-44-169-2025), 2025-06-26
Supplement: Supplementary file 1 [file jm-44-169-2025-supplement.zip]

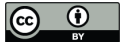

## *Supplement of*

# **Analysis of the types of *Reinholdella*, an important Jurassic foraminiferal genus**

**Marjorie Apthorpe**

*Correspondence to:* Marjorie Apthorpe (marjorieapthorpe@gmail.com)

- jm-44-169-2025-supplement-title-page.pdf
- Figure 1-490.jpg
- Figure 2-492.jpg
- Figure 3-496.jpg
- Figure 4-497.jpg
- Figure 5-499.jpg
- Figure 6-501 copy.jpg
- Figure 7-503.jpg
- Figure 8-505.jpg
- Figure 9-rev4.jpg
- Text-Fig-1-ed.jpg
- Text-Fig-2 vs2.jpg
- Text-Fig-3 2025.jpg
- Text-Fig-4.jpg
- Text-Fig-5.jpg
- jm-2024-28-supplement-version1.pdf

The copyright of individual parts of the supplement might differ from the article licence.
